# Supplementary material
Source: publisher site journal article supplement (https://www.dovepress.com/article/274290)
Supplement: Supplementary file 1 [file get_supplementary_file.php]

**Figure S1:** Photo of 96-well plate showing MIC (minimum inhibitory concentration) determination using the broth microdilution method. Two-fold serial dilutions of each of the tested formula were done from one row to the next. The wells were inoculated with *Candida albicans* ATCC 60193 suspension.

Abbreviations: FTN, Fenticonazole nitrate and TPs: terpesomes.

**Figure S2:** 3D plots for the effect of terpene type (X1) and terpene amount (X2) on (a) EE%, (b) PS and (c) PDI of FTN loaded TPs.

Abbreviations: EE%, entrapment efficiency percent; PS, particle size; PDI, polydispersity index; FTN, fenticonazole nitrate and TPs; terpesomes.

**Figure S3:** Measurement of (a) particle size and (b) zeta potential of the optimized TPs.

Abbreviation: TPs, terpesomes.
